# Supplementary material for: Role of coprophagy in the cecal microbiome development of an herbivorous bird Japanese rock ptarmigan
Source: PubMed Central journal article supplement — J Vet Med Sci. 2019 Aug 12;81(9):1389–99. doi: 10.1292/jvms.19-0014 (PMC6785603; doi:10.1292/jvms.19-0014), 2019-08-12
Supplement: jvms-81-1389-s001.pdf [file jvms-81-1389-s001.pdf]

Table S1. Dates of feces collection from Japanese rock ptarmigan

| Date | Cage 1        |              | Cage 2        |              | Cage 3        |              | Samle of Adult |
|------|---------------|--------------|---------------|--------------|---------------|--------------|----------------|
|      | Age of chicks | Sampled date | Age of chicks | Sampled date | Age of chicks | Sampled date |                |
| June | 27            | 1            |               |              |               |              |                |
|      | 28            | 2            |               |              |               |              | Cage 1 × 1     |
|      | 29            | 3            |               |              |               |              | Cage 2 × 1     |
|      | 30            | 4            | 1             | 1            |               |              | Cage 3 × 1     |
| July | 1             | 5            | 1             | 2            |               | 1            |                |
|      | 2             | 6            | 1             | 3            |               | 2            |                |
|      | 3             | 7            | 1             | 4            | 1             | 3            |                |
|      | 4             | 8            |               | 5            |               | 4            | 1              |
|      | 5             | 9            |               | 6            | 1             | 5            | 1              |
|      | 6             | 10           |               | 7            | 1             | 6            | 1              |
|      | 7             | 11           | 1             | 8            |               | 7            |                |
|      | 8             | 12           |               | 9            |               | 8            |                |
|      | 9             | 13           |               | 10           | 1             | 9            | 1              |
|      | 10            | 14           | 1             | 11           |               | 10           |                |
|      | 11            | 15           |               | 12           |               | 11           |                |
|      | 12            | 16           |               | 13           | 1             | 12           |                |
|      | 13            | 17           |               | 14           |               | 13           | 1              |
|      | 14            | 18           |               | 15           |               | 14           |                |
|      | 15            | 19           |               | 16           |               | 15           |                |
|      | 16            | 20           |               | 17           | 1             | 16           |                |
|      | 17            | 21           |               | 18           |               | 17           | 1              |
|      | 18            | 22           | 1             | 19           | 1             | 18           | 1              |
|      | 19            | 23           |               | 20           |               | 19           |                |
| 20   | 24            |              | 21            |              | 20            |              |                |
| 21   | 25            |              | 22            |              | 21            |              |                |

Cage 2 × 1  
Cage 1 • Cage 3 × 1

Table S2. Effect of age on the relative abundance of common bacterial genera in Japanese rock ptarmigans

| Genus                                     | The number of OTUs | 1 week old | 2 weeks old | 3 weeks old | Adult   |
|-------------------------------------------|--------------------|------------|-------------|-------------|---------|
| <i>Olsenella</i>                          | 52                 | 0.25076    | 0.18724     | 0.11161     | 0.14615 |
| <i>Actinomyces</i>                        | 6                  | 0.13004    | 0.10508     | 0.06597     | 0.10808 |
| <i>Alkalibaculum</i>                      | 14                 | 0.04830    | 0.06265     | 0.05038     | 0.07434 |
| <i>Slackia</i>                            | 14                 | 0.06321    | 0.03732     | 0.02729     | 0.06824 |
| <i>Megasphaera</i>                        | 1                  | 0.00375    | 0.00064     | 0.00777     | 0.05158 |
| <i>Shuttleworthia</i>                     | 25                 | 0.08806    | 0.02626     | 0.03659     | 0.04340 |
| <i>Erysipelotrichaceae incertae sedis</i> | 4                  | 0.00243    | 0.12268     | 0.03593     | 0.04146 |
| <i>Vallitalea</i>                         | 1                  | 0.00262    | 0.00371     | 0.00958     | 0.02767 |
| <i>Robinsoniella</i>                      | 9                  | 0.01075    | 0.00852     | 0.00648     | 0.02334 |
| <i>Defluviitalea</i>                      | 2                  | 0.00289    | 0.00442     | 0.00043     | 0.02223 |
| <i>Syntrophococcus</i>                    | 5                  | 0.00822    | 0.00868     | 0.00640     | 0.02212 |
| <i>Megamonas</i>                          | 5                  | 0.00193    | 0.00473     | 0.03374     | 0.02123 |
| <i>Fusicatenibacter</i>                   | 6                  | 0.14638    | 0.05723     | 0.13851     | 0.01907 |
| <i>Ruminococcus2</i>                      | 49                 | 0.00638    | 0.00625     | 0.00390     | 0.01897 |
| <i>Bifidobacterium</i>                    | 1                  | 0.00713    | 0.00273     | 0.00547     | 0.01788 |
| <i>Eubacterium</i>                        | 3                  | 0.00679    | 0.00937     | 0.00655     | 0.01575 |
| <i>Proteinivorax</i>                      | 1                  | 0.00787    | 0.00609     | 0.00338     | 0.01372 |
| <i>Citrobacter</i>                        | 1                  | 0.00005    | 0.00008     | 0.03688     | 0.01270 |
| <i>Lachnospiraceae incertae sedis</i>     | 32                 | 0.02720    | 0.03292     | 0.02865     | 0.01243 |
| <i>Anaerobacterium</i>                    | 12                 | 0.00109    | 0.00153     | 0.00318     | 0.01194 |
| <i>Hungatella</i>                         | 6                  | 0.00891    | 0.02150     | 0.04581     | 0.01189 |
| <i>Flavonifractor</i>                     | 17                 | 0.00621    | 0.00422     | 0.00204     | 0.01183 |
| <i>Clostridium XVIII</i>                  | 12                 | 0.00935    | 0.05847     | 0.02520     | 0.01154 |
| <i>Parvibacter</i>                        | 11                 | 0.00763    | 0.01180     | 0.00631     | 0.00826 |
| <i>Deismabacter</i>                       | 16                 | 0.00589    | 0.00393     | 0.00339     | 0.00713 |
| <i>Anaeroglobus</i>                       | 2                  | 0.00138    | 0.00153     | 0.00292     | 0.00580 |
| <i>Clostridium XIVa</i>                   | 11                 | 0.00947    | 0.03570     | 0.01616     | 0.00549 |
| <i>Coprococcus</i>                        | 20                 | 0.00582    | 0.02304     | 0.01522     | 0.00537 |
| <i>Dialister</i>                          | 1                  | 0.00020    | 0.00013     | 0.00027     | 0.00395 |
| <i>Asaccharobacter</i>                    | 2                  | 0.03125    | 0.02291     | 0.00792     | 0.00379 |
| <i>Faecalitalea</i>                       | 1                  | 0.00132    | 0.00075     | 0.00024     | 0.00351 |
| <i>Pseudoflavonifractor</i>               | 8                  | 0.00257    | 0.00226     | 0.00426     | 0.00331 |
| <i>Adlercreutzia</i>                      | 6                  | 0.00303    | 0.00096     | 0.00122     | 0.00254 |
| <i>Anaerorhabdus</i>                      | 1                  | 0.00070    | 0.00058     | 0.00022     | 0.00238 |
| <i>Lachnoanaerobaculum</i>                | 2                  | 0.00071    | 0.00089     | 0.00067     | 0.00225 |
| <i>Papillibacter</i>                      | 2                  | 0.00069    | 0.00055     | 0.00083     | 0.00214 |
| <i>Eggerthella</i>                        | 3                  | 0.00194    | 0.00136     | 0.00095     | 0.00167 |
| <i>Sporobacter</i>                        | 2                  | 0.00056    | 0.00015     | 0.00045     | 0.00149 |
| <i>Acidaminobacter</i>                    | 3                  | 0.00055    | 0.00082     | 0.00031     | 0.00139 |
| <i>Anaerotruncus</i>                      | 3                  | 0.00054    | 0.00208     | 0.00199     | 0.00138 |
| <i>Anaerospora</i>                        | 1                  | 0.00009    | 0.00045     | 0.00470     | 0.00135 |
| <i>Eisenbergiella</i>                     | 4                  | 0.00110    | 0.00070     | 0.00045     | 0.00134 |
| <i>Acetatifactor</i>                      | 1                  | 0.00015    | 0.00004     | 0.00046     | 0.00125 |
| <i>Psychrosinus</i>                       | 2                  | 0.00018    | 0.00010     | 0.00009     | 0.00125 |
| <i>Geosporobacter</i>                     | 2                  | 0.00016    | 0.00020     | 0.00006     | 0.00118 |
| <i>Intestinimonas</i>                     | 4                  | 0.00289    | 0.00288     | 0.00489     | 0.00118 |
| <i>Scardovia</i>                          | 1                  | 0.00043    | 0.00019     | 0.00031     | 0.00118 |
| <i>Coriobacterium</i>                     | 2                  | 0.00022    | 0.00015     | 0.00038     | 0.00103 |
| <i>Anaerovorax</i>                        | 4                  | 0.00086    | 0.00173     | 0.00048     | 0.00093 |
| <i>Murimonas</i>                          | 4                  | 0.00070    | 0.00099     | 0.00053     | 0.00092 |
| <i>Allobaculum</i>                        | 1                  | 0.00091    | 0.00107     | 0.00012     | 0.00086 |
| <i>Clostridium IV</i>                     | 2                  | 0.00085    | 0.00240     | 0.00309     | 0.00075 |
| <i>Acetitomaculum</i>                     | 2                  | 0.00050    | 0.00041     | 0.00039     | 0.00071 |
| <i>Christensenella</i>                    | 3                  | 0.00041    | 0.00134     | 0.00089     | 0.00070 |
| <i>Cryptobacterium</i>                    | 3                  | 0.00035    | 0.00720     | 0.00498     | 0.00065 |
| <i>Blautia</i>                            | 3                  | 0.00088    | 0.00075     | 0.00043     | 0.00064 |
| <i>Mogibacterium</i>                      | 1                  | 0.00024    | 0.00067     | 0.00021     | 0.00031 |
| <i>Paraeggerthella</i>                    | 1                  | 0.00023    | 0.00010     | 0.00007     | 0.00030 |
| <i>Denitrobacterium</i>                   | 1                  | 0.00024    | 0.00022     | 0.00005     | 0.00026 |
| <i>Gordonibacter</i>                      | 1                  | 0.00021    | 0.00016     | 0.00005     | 0.00024 |
| <i>Faecalicoccus</i>                      | 1                  | 0.00029    | 0.00226     | 0.00573     | 0.00023 |
| <i>Paraprevotella</i>                     | 1                  | 0.00016    | 0.00004     | 0.00002     | 0.00020 |
| <i>Brassicibacter</i>                     | 1                  | 0.00012    | 0.00008     | 0.00003     | 0.00019 |
| <i>Dorea</i>                              | 1                  | 0.00226    | 0.00599     | 0.00546     | 0.00019 |
| <i>Catonella</i>                          | 1                  | 0.00008    | 0.00003     | 0.00002     | 0.00019 |
| <i>Lactococcus</i>                        | 2                  | 0.00010    | 0.00155     | 0.00110     | 0.00016 |
| <i>Ethanoligenens</i>                     | 1                  | 0.00004    | 0.00013     | 0.00008     | 0.00015 |
| <i>Acetanaerobacterium</i>                | 1                  | 0.00006    | 0.00030     | 0.00013     | 0.00013 |
| <i>Desulfitispora</i>                     | 1                  | 0.00014    | 0.00016     | 0.00007     | 0.00011 |
| <i>Ruminococcus</i>                       | 1                  | 0.00002    | 0.00011     | 0.00009     | 0.00009 |
| <i>Anaerosolibacter</i>                   | 1                  | 0.00012    | 0.00012     | 0.00006     | 0.00007 |
| <i>Marvinbryantia</i>                     | 1                  | 0.00001    | 0.00010     | 0.00010     | 0.00003 |
| <i>Butyricoccus</i>                       | 1                  | 0.00022    | 0.00019     | 0.00055     | 0.00003 |
| <i>Arthrobacter</i>                       | 1                  | 0.00002    | 0.00006     | 0.00003     | 0.00002 |
| <i>Lachnospira</i>                        | 1                  | 0.00060    | 0.00013     | 0.00026     | 0.00001 |
| Total                                     | 431                | 0.93046    | 0.91477     | 0.79141     | 0.88821 |

<0.00010
 0.00010-0.00099
 0.00100-0.00999
 0.01000-0.09999
 ≥ 0.10000

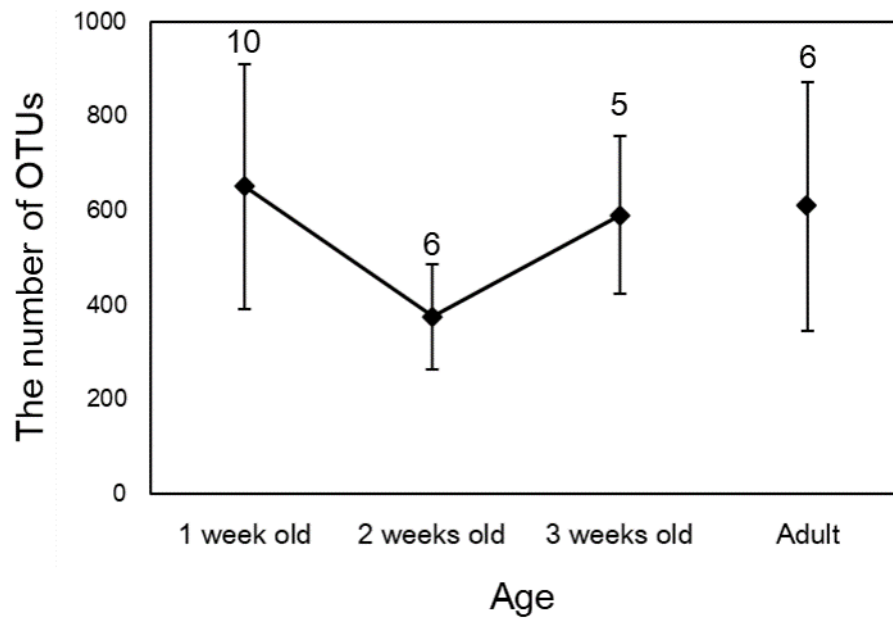

**Fig. S1. Abundance of bacterial operational taxonomic units (OTUs) in the cecal microbiome of Japanese rock ptarmigans.** Cecal feces were collected from 1-, 2-, and 3-week-old chicks, as well from their hens. Error bars indicate standard deviation values.

The figures above error bars indicate the sample numbers.

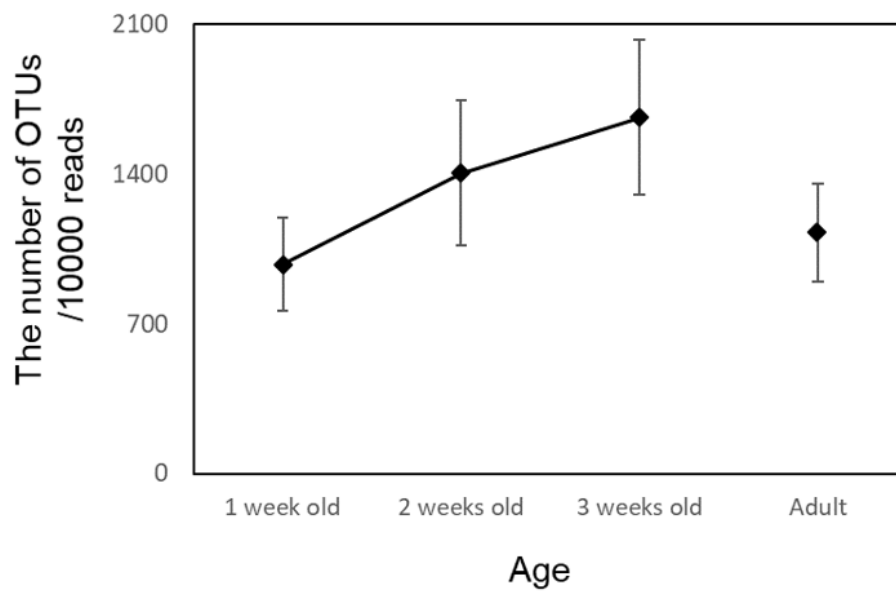

**Fig. S2. Normalized abundance of bacterial operational taxonomic units (OTUs) detected in the cecal microbiomes of Japanese rock ptarmigans.** The data include OTUs with less than three reads in each sample. OTU numbers were normalized by total read number, in order to avoid bias from differences in sequencing depth.
